# Supplementary material
Source: Springer Nature journal article supplement (https://www.springermedizin.de/resource/supplementary/12985_2011_1928_MOESM2_ESM.pdf/9610736)

**A**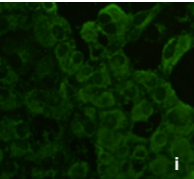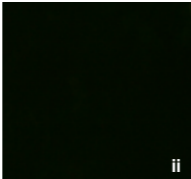**B**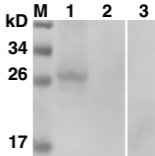

Supplement: MOESM2 [file 9610736]
